# Supplementary material for: Radiosynthesis and Evaluation of Talazoparib and Its Derivatives as PARP-1-Targeting Agents
Source: MDPI journal article supplement (doi:10.3390/biomedicines9050565), 2021-05-18
Supplement: s1 [file s1]

*Supplementary Materials*

**Radiosynthesis and *in vitro* and *in vivo* evaluation of talazoparib and its derivatives as PARP-1 targeting agents for cancer**

Dong Zhou, Huaping Chen, Cedric Mpoy, Sadia Afrin, Buck E. Rogers, Joel R. Garbow, John A. Katzenellenbogen, Jinbin Xu

**Table of contents**

|                                                                                                                                                                      |     |
|----------------------------------------------------------------------------------------------------------------------------------------------------------------------|-----|
| <b>Figure S1.</b> Radiosynthesis of [ <sup>3</sup> H]WC-DZ from the bromo-precursor WC-DZ-Br.....                                                                    | 002 |
| <b>Figure S2.</b> Chiral analytical HPLC of talazoparib derivatives (a) <b>3a</b> (F), (b) <b>3b</b> (Br), (c) <b>3c</b> (I).....                                    | 002 |
| <b>Figure S4.</b> Chiral HPLC separation of [ <sup>18</sup> F]talazoparib ([ <sup>18</sup> F] <b>3a'</b> ) and its enantiomer ([ <sup>18</sup> F] <b>3a''</b> )..... | 003 |
| <b>Figure S5.</b> Analytical chiral HPLC of [ <sup>18</sup> F]talazoparib: (a) Animal dose; (b) Co-injection with authentic talazoparib.....                         | 004 |

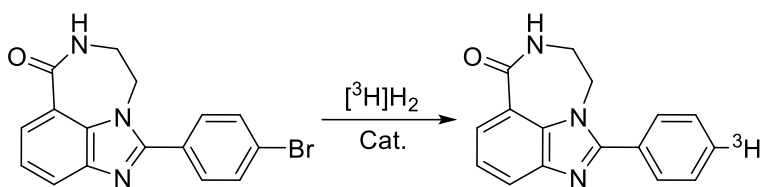

**Figure S1.** Radiosynthesis of  $[^3\text{H}]$ WC-DZ from the bromo-precursor WC-DZ-Br

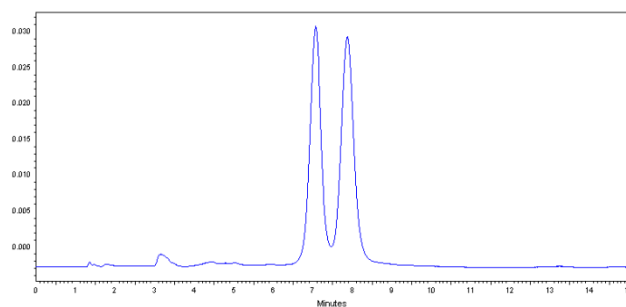

(a)

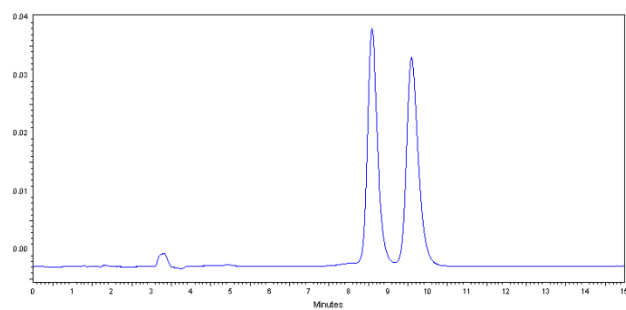

(b)

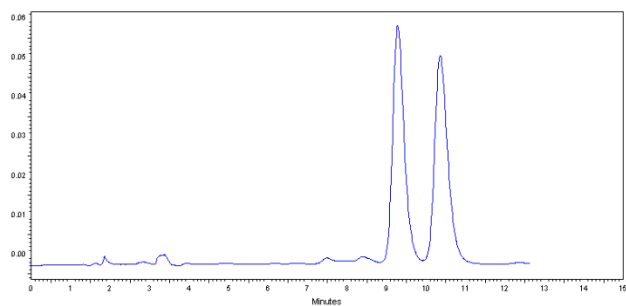

(c)

**Figure S2.** Chiral analytical HPLC of talazoparib derivatives (a) **3a** (F), (b) **3b** (Br), (c) **3c** (I). Column: Chirobiotech T; Mobile phase: 35% methanol/water; Flow rate: 1 mL/min; UV: 254 nm.

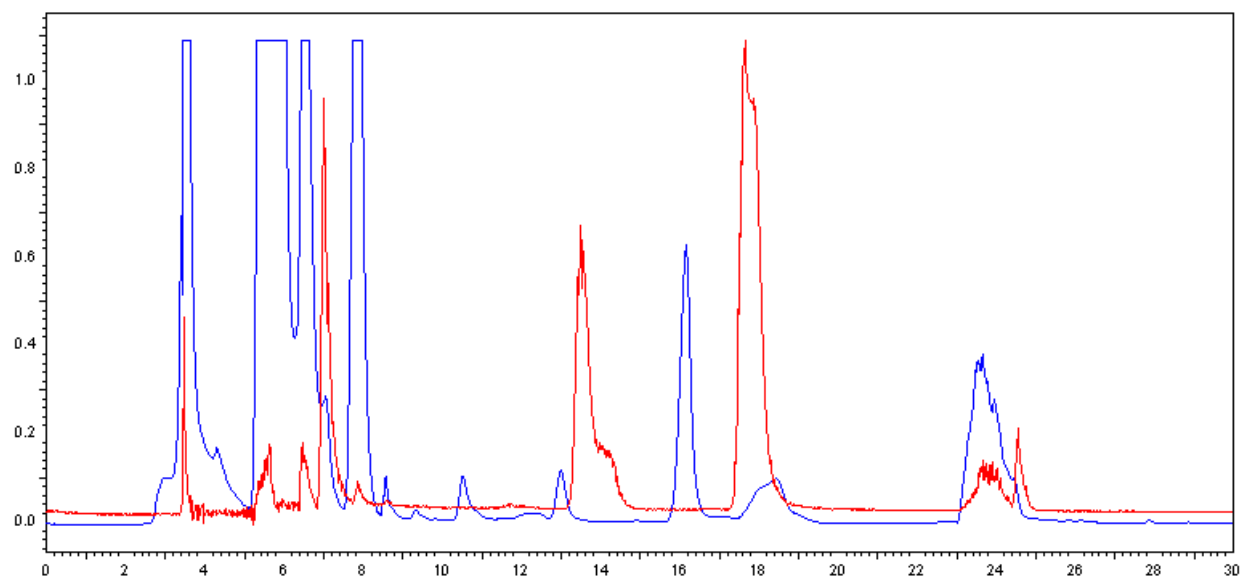

**Figure S3.** Semi-preparative HPLC of [ $^{18}\text{F}$ ]**3a**. [ $^{18}\text{F}$ ]**3a** was collected at 18 min. Blue: UV; Red: Radioactivity.

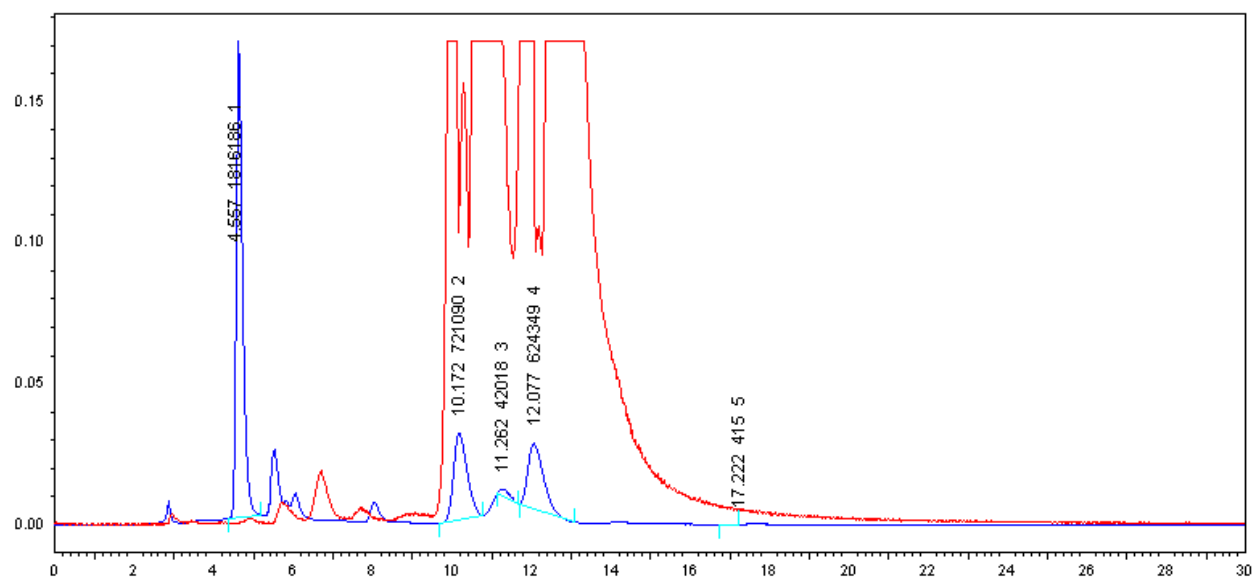

**Figure S4.** Chiral HPLC separation of [ $^{18}\text{F}$ ]talazoparib ([ $^{18}\text{F}$ ]**3a''**) and its enantiomer ([ $^{18}\text{F}$ ]**3a'**). [ $^{18}\text{F}$ ]Talazoparib ([ $^{18}\text{F}$ ]**3a''**) was collected at 12.1 min. Blue: UV; Red: Radioactivity.

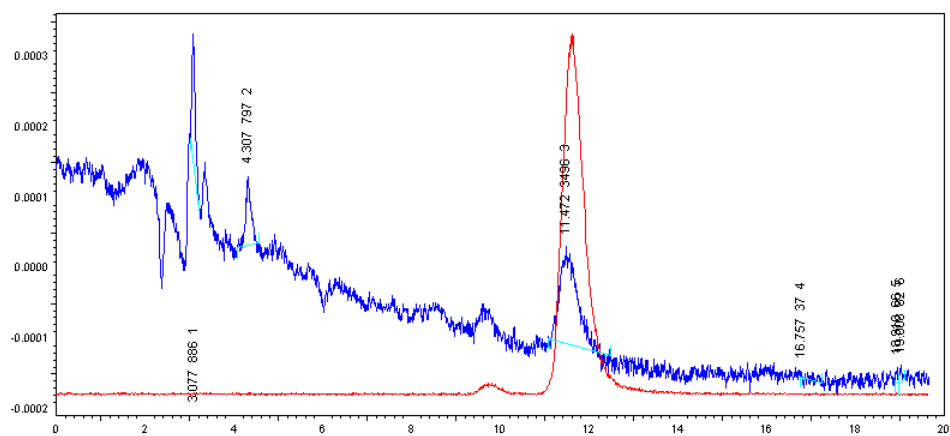

(a)

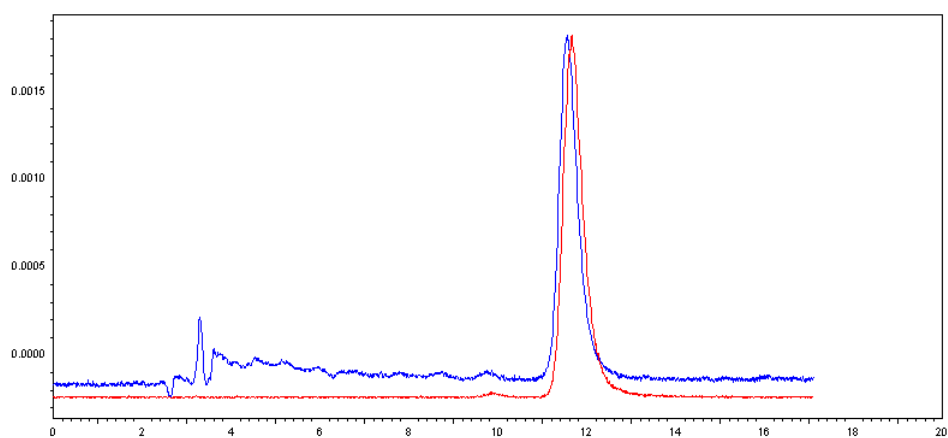

(b)

**Figure S5.** Analytical chiral HPLC of [ $^{18}\text{F}$ ]talazoparib: (a) Animal dose; (b) Co-injection with authentic Talazoparib. Blue: UV; Red: Radioactivity.
